# Supplementary material for: Sulfonated Pentablock Copolymer Coating of Polypropylene Filters for Dye and Metal Ions Effective Removal by Integrated Adsorption and Filtration Process
Source: MDPI journal article supplement (doi:10.3390/ijms231911777), 2022-10-04
Supplement: s1 [file s1]

## Supplementary Materials

# Sulfonated Pentablock Copolymer Coating of Polypropylene Filters for Dye and Metal Ions Effective Removal by Integrated Adsorption and Filtration Process

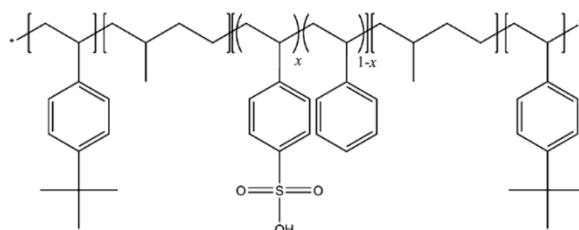

**Figure S1.** Molecular structure of sulfonated pentablock copolymer (s-PBC) (Nexar™).

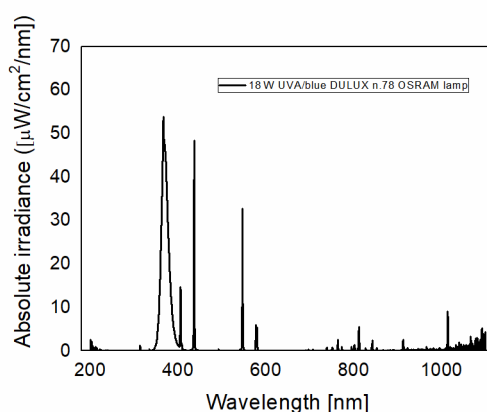

**Figure S2.** The emission spectrum (UV emission at 365 nm and a few narrow lines in the visible) of the 18 W UVA/blue DULUX n.78 OSRAM lamp used for irradiation of the coating layer.

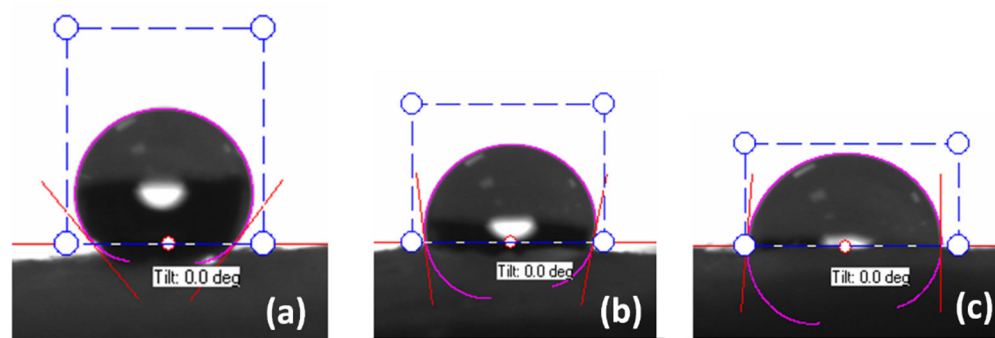

| Sample      | Average value (left side) | Average value (right side) |
|-------------|---------------------------|----------------------------|
| PP          | 130.8                     | 128.4                      |
| S-PBC@PP    | 102.4                     | 103.9                      |
| S-PBC@PP_UV | 84.4                      | 86.8                       |

**Figure S3.** Contact angle measurements for different filters: (a) PP, (b) s-PBC@PP (center) and (c) s-PBC@PP after UV irradiation. The table reports the average values measured on the left and right side of three different drops for each sample.
